# Supplementary figures and images for: Interleukin‐10 and Zonulin Are Associated With Postoperative Delayed Gastric Emptying in Critically Ill Surgical Pediatric Patients: A Prospective Pilot Study
Source: PubMed Central journal article supplement — JPEN J Parenter Enteral Nutr. 2020 Jun 3;44(8):1407–16. doi: 10.1002/jpen.1874 (PMC7754495; doi:10.1002/jpen.1874), 2020-06-03

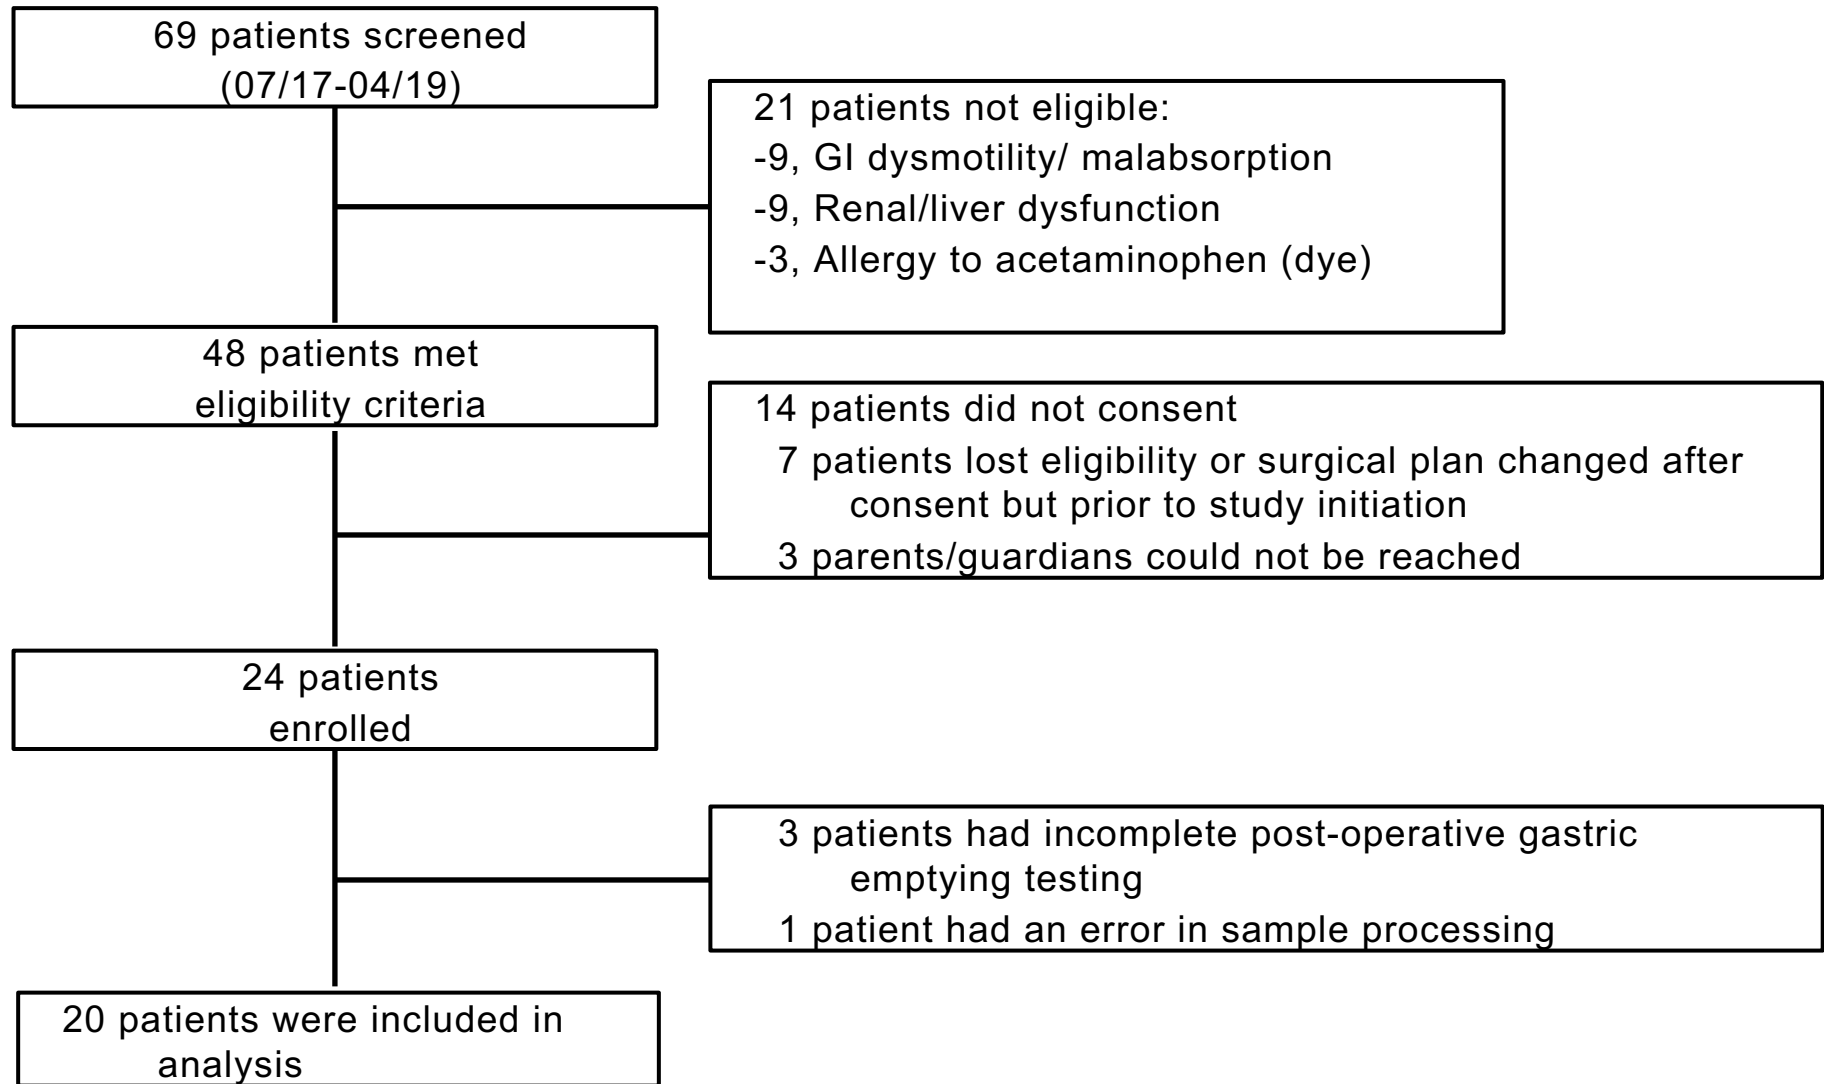

Supplement: JPEN-44-1407-s001.pdf [file JPEN-44-1407-s001.pdf]
